1  
2  
3  
4  
5  
6  
7  
8  
9  
10  
11  
12  
13  
14  
15  
16  
17  
18  
19  
20  
21  
22  
23  
24  
25  
26  
27  
28  
29  
30

### **Quantitative analysis of the ThrbCRM1-centered gene regulatory network**

Benjamin Souferi<sup>1,2</sup>, Mark M. Emerson<sup>1,3</sup>

<sup>1</sup> Department of Biology, The City College of New York, City University of New York, New York, NY, 10031

<sup>2</sup> Present address: Touro College of Osteopathic Medicine, New York, NY 10027

<sup>3</sup> Biology Ph.D. Program, Graduate Center, City University of New York, New York, NY, 10031

\*Corresponding author: memerson@ccny.cuny.edu

#### **Email addresses:**

Benjamin Souferi: benjaminsouferi@gmail.com

Mark Emerson: memerson@ccny.cuny.edu

**Running title:** Quantitative analysis of the ThrbCRM1 GRN

**Key words:** cis-regulatory elements, cone photoreceptors, reporter assays, gene regulatory networks, retinal development, flow cytometry, quantitative analysis, electroporation

31 **Summary Statement**

32 Systematic variation of the levels of a transcriptional reporter plasmid, its trans-  
33 acting factors, and transcription factor binding sites reveals properties of a retinal  
34 enhancer during development.

35

36

37 **Abstract**

38 Enhancer activity is determined by both the activity and occupancy of  
39 transcription factors as well as the specific sequences they bind. Experimental  
40 investigation of this dynamic requires the ability to manipulate components of the  
41 system, ideally in as close to an in vivo context as possible. Here we use  
42 electroporation of plasmid reporters to define critical parameters of a specific cis-  
43 regulatory element, ThrbCRM1, during retinal development. ThrbCRM1 is  
44 associated with cone photoreceptor genesis and activated in a subset of  
45 developing retinal cells that co-express the Otx2 and Onecut1 (OC1)  
46 transcription factors. Variation of reporter plasmid concentration was used to  
47 generate dose response curves and revealed an effect of binding site availability  
48 on the number and strength of cells with reporter activity. Critical sequence  
49 elements of the ThrbCRM1 element were defined using both mutagenesis and  
50 misexpression of the Otx2 and OC1 transcription factors in the developing retina.  
51 Additionally, these experiments suggest that the ThrbCRM1 element is co-  
52 regulated by Otx2 and OC1 even under conditions of sub-optimal binding of  
53 OC1.

54

55

56

57

58

59

60

61

62

## 63 **Introduction**

64       The rules and logic of cis-regulatory activity that underlie dynamic gene  
65 regulation during development are an area of great interest (Rickels and  
66 Shilatifard, 2018). At present, quantitative measurements are largely determined  
67 through highly reductionist approaches such as EMSAs or protein microarrays,  
68 while in vivo activity is qualitative, limiting the ability to correlate specific  
69 sequence elements with reporter output. Elucidation of this process during  
70 development is further complicated by temporal dynamics as cells have rapid  
71 shifts in active gene regulatory networks (GRNs). However, identification of these  
72 networks provides insights into how transcription factor expression and activation  
73 are coordinated to direct cell fate choices during development.

74       Electroporation is one method to identify and characterize cis-regulatory  
75 elements as components of GRNs. Several studies have used this method to  
76 identify cis-regulatory elements, providing critical insights into retinal  
77 development and other developmental contexts (Bery et al., 2014; Emerson et  
78 al., 2013; Emerson and Cepko, 2011; Hsiao et al., 2007; Maguire et al., 2018;  
79 Mills et al., 2017; Uchikawa et al., 2004; Wang et al., 2014). In addition, the  
80 technique of electroporation is widely used to misexpress transcription factors, or  
81 other signaling factors (Chang et al., 2013; Cherry et al., 2011; de Melo et al.,  
82 2011; Emerson et al., 2013; La Torre et al., 2013; Matsuda and Cepko, 2007;  
83 Mattar et al., 2015; Onishi et al., 2010; Wang et al., 2014). However, the effect of  
84 specific parameters such as concentration of plasmid DNA are largely  
85 unaddressed. To date, it has not been established how reporter or misexpression  
86 DNA plasmid concentration affect the output and interpretation of electroporation  
87 experiments.

88       The vertebrate retina is an excellent model organ to investigate the  
89 development of nervous system complexity. Recent analysis has suggested that  
90 the retina may be composed of as many as 100 cell types, each of which are  
91 generated from multipotent retinal progenitor cells during development (Holt et  
92 al., 1988; Turner et al., 1990; Wetts and Fraser, 1988; Zeng and Sanes, 2017).

93 Recently, the existence of restricted progenitor cell states that preferentially give  
94 rise to certain cell types has been characterized (Bery et al., 2014; Emerson et  
95 al., 2013; Emerson and Cepko, 2011; Hsiao et al., 2007; Maguire et al., 2018;  
96 Mills et al., 2017; Uchikawa et al., 2004; Wang et al., 2014). One of which gives  
97 rise to cone photoreceptors and horizontal cells and can be identified by  
98 reporters driven by the Thyroid hormone receptor beta gene cis-regulatory  
99 module 1 (ThrbCRM1) element (Emerson et al., 2013). Previous work has  
100 suggested that the ThrbCRM1 element is active in retinal progenitor cells that co-  
101 express the transcription factors Otx2 and Onecut1 (OC1). Misexpression and  
102 loss-of-function analysis supports a model in which Otx2 and OC1 are both  
103 required for induction of ThrbCRM1 reporters, likely through direct binding of  
104 each transcription factor to the element, though the direct mechanism remains  
105 unknown (Emerson et al., 2013).

106 Here we describe a quantitative analysis of the ThrbCRM1 element in  
107 developing retinas. Using electroporation as a method to introduce fluorescent  
108 reporter plasmids and flow cytometry to quantitate reporter activity, the activity of  
109 ThrbCRM1 elements were measured in terms of total reporter-positive cells as  
110 well as fluorescence level of cells within the population. This analysis revealed  
111 distinct differences in concentration-dependent reporter activity that depended on  
112 the copy number of cis-regulatory elements. Misexpression of the Otx2 and OC1  
113 activating transcription factors also led to concentration-dependent changes in  
114 reporter activity that suggested saturation of reporter activation also occurred.  
115 Flow cytometry was used to determine the likely functional Otx2 binding site.  
116 Lastly, using these mutated ThrbCRM1 plasmids in combination with Otx2 and  
117 OC1 misexpression plasmids suggested that the co-requirement for these two  
118 transcription factors is likely not at the step of complex formation on DNA.

119

## 120 **Materials and Methods**

### 121 **Animals**

122 All methods used in animal studies were approved by City College of New York,  
123 CUNY animal care protocols. Fertilized chicken eggs and CD-1 mice were

124 obtained from Charles River. Eggs were stored in a 16° room up to 10 days  
125 before incubation and incubated in a 38°C humidified incubator. Retinas were  
126 isolated from chicken embryos and mouse P0 pups without regard to sex.

### 127 **DNA Plasmids**

128 The Stagia3 EGFP reporter plasmid uses a minimal TATA box from Herpes  
129 Simplex Virus and is described in (Billings et al., 2010). The co-electroporation  
130 plasmids CAG::mCherry (constructed by Takahiko Matsuda and reported in  
131 (Wang et al., 2014)), CAG::EGFP (Matsuda and Cepko, 2004), CAG::Nucβ-gal  
132 (Emerson and Cepko, 2011), UbiquitinC::TdTomato (UbiqC::TdT) (Rompani and  
133 Cepko, 2008) have been described previously. CAG::Otx2 and CAG::OC1  
134 misexpression plasmids use mouse versions of the relevant transcription  
135 factors(Emerson et al., 2013; Kim et al., 2008). The Thrb reporters  
136 ThrbCRM1(2X)::EGFP and ThrbCRM1(4X)::EGFP used in Figures 1, 2, 3 and 4  
137 were previously reported (Emerson et al., 2013). The ThrbCRM(2X)::EGFP  
138 reporter used in Figure 5 differs from the reporter used in previous Figures with  
139 regards to the restriction enzyme sites used to insert the 40 base pair ThrbCRM1  
140 element into Stagia3. Briefly, one pair of complementary ThrbCRM1 oligos were  
141 designed such that annealing produced a double-stranded DNA with a Sal1  
142 overhang on one end and a Hind3 overhang on the other. A separate pair of  
143 complementary ThrbCRM1 oligos were designed such that annealing produced a  
144 double-stranded DNA molecule with a Hind3 overhang on one end and an  
145 EcoR1 overhang on the other end. Oligo pairs were annealed and  
146 phosphorylated by T4 Polynucleotide kinase enzyme (NEB, M0201S), chloroform  
147 extracted, and precipitated overnight. A triple ligation (Takara, 6022) with Stagia3  
148 digested with Sal1 and EcoR1 restriction enzymes produced clones with two  
149 copies of the ThrbCRM1 element oriented the same way in Stagia3 and joined by  
150 a Hind3 restriction site. Oligos encoding the mutant forms of ThrbCRM1  
151 described in Figure 5 were cloned in a similar manner to the wildtype oligos. All  
152 constructs were verified by Sanger sequencing. All DNA plasmids used in  
153 electroporation experiments were purified using Midiprep DNA isolation kits

154 (Qiagen, 12143) and resuspended in Tris-EDTA (TE) buffer. DNA concentration  
155 and purity was verified using a Nanodrop 1000 (Thermoscientific).

### 156 **DNA electroporation mixes**

157 DNA electroporation mixes were made with a volume of either 50 or 55ul, with  
158 50ul used in the electroporation chamber for all experiments. A 10X phosphate  
159 buffered solution (PBS) was used to generate a final concentration of 1X PBS.  
160 To aid in accurate pipetting of viscous DNA solutions, a positive displacement  
161 pipettor (Eppendorf, Biomaster-4830) was used. For all experiments that involved  
162 a comparison between the effect of a particular plasmid, a mastermix was  
163 generated that included PBS and other plasmids found in all samples. For  
164 experiments in which the amount of EGFP reporter varied, 55ul DNA mixes were  
165 prepared by adding the determined amount of EGFP plasmid to a tube and  
166 preparing a mastermix of PBS and the other plasmids found in all samples before  
167 adding to the EGFP tubes. A Nanodrop blank sample was prepared by adding  
168 the appropriate volume of TE and mastermix and then prepared DNA mixes were  
169 measured at 260nm. The average of three spectrophotometer readings were  
170 used to empirically determine the amount of EGFP plasmid present in mixes, to  
171 avoid data skewing by pipetting error and was used in the plotting of data.

### 172 **DNA electroporations**

173 Methodology for DNA electroporations was as described in (Emerson and  
174 Cepko, 2011) with the exception that a Nepagene Super Electroporator NEPA21  
175 Type II was used to generate voltage pulses. Retinas were cultured for 2 days.  
176 For all electroporation experiments that used an EGFP reporter and a TdTomato  
177 co-electroporation control for flow cytometry analysis, a set of retinas were  
178 electroporated either with CAG::EGFP or UbiqC::TdT, and together with an  
179 unelectroporated retina, were used to generate compensation controls for the  
180 flow cytometer.

### 181 **Retina Dissociation**

182 Retinal pigment epithelium and excess vitreal tissue was removed in HBSS  
183 media (GIBCO, 14170112) using forceps and retina was placed in  
184 microcentrifuge tube with 200ul HBSS. A papain activating solution of 200

185  $\mu$ l/retina containing 11.6mM L-cysteine, 1.11mM EDTA and 5 $\mu$ l papain  
186 (Worthington Biochemical, L5003126) was added and incubated at 37°C for 15-  
187 25 minutes for chicken retinas or 35-45 minutes for mouse retinas. During this  
188 period, each tube was individually flicked to help break down the tissue into  
189 smaller clumps. 600  $\mu$ l of 10%FBS (ThermoFisher, A3160602)/DMEM (Life  
190 Technologies, 11995-073) was added to stop the reaction. 10  $\mu$ l/retina of DNase  
191 (Sigma-Aldrich 4536282001) was added, incubated in a 37°C water bath for five  
192 minutes, washed in DMEM and then fixed in 4% paraformaldehyde/1X PBS for  
193 15 minutes. Cells were washed three times in 1 ml of 1X PBS upon being filtered  
194 through a 40 $\mu$ m strainer (Biologix, 15-1040). All centrifuge spins were at 1,700rcf  
195 for 5 minutes and supernatant removed with a P1000 pipettor.

### 196 **Flow cytometry**

197 The dissociated single-cell suspensions were analyzed via flow cytometry using  
198 a BD Biosciences LSR II or FACS Aria machine. Approximately 300,000 cells  
199 were analyzed for each sample.

### 200 **Data quantitation and representation**

201 Flow cytometry data was analyzed and plotted using Flowjo software. All  
202 experiments where percentages of EGFP-positive cells were calculated  
203 represent the averages calculated from 3 or 4 independently electroporated  
204 retinas. All average values refer to means and error bars in figures represent  
205 95% confidence intervals. For plotting of Bin percentages in Figures 2 and 4, y-  
206 axis percentages were automatically set to "0" for samples in which no GFP  
207 reporter plasmid was added to prevent plot skewing by small numbers of cells. In  
208 cases where results were tested for statistical significance, a Mann-Whitney t-test  
209 was applied using JASP software(JASP Team, 2018). In cases in which a t-test  
210 was not appropriate because more than two groups were being compared, a  
211 one-way ANOVA with a post hoc Dunnetts test was applied using R 3.3.0. and  
212 the multcomp package (Hothorn et al., 2008; Team, 2018). All experiments were  
213 independently replicated and statistically analyzed to verify statistical significance  
214 of presented results.

### 215 **Immunofluorescence and Confocal Microscopy**

216 Retinas analyzed for confocal microscopy were removed from filters after two  
217 days and fixed in 4% paraformaldehyde for 30 minutes at room temperature with  
218 gentle shaking in 24 well plates. After three washes with 1X PBS, retinas were  
219 sunk in 30% sucrose/0.5X PBS at 4 °C. Retinas were frozen in OCT (Sakura  
220 Tissue-Tek, 4583) and sectioned to 20µm thickness on a Leica CM1950 cryostat  
221 and placed on glass slides (Fisher Scientific, 12-550-15). Slides were processed  
222 for immunofluorescence as previously described (Emerson and Cepko, 2011).  
223 Primary antibodies used were chicken anti-GFP (abcam, 13970, 1:2,000) and  
224 mouse anti-β-galactosidase (DSHB, 40-1a-s, 1:20). Secondary antibodies were  
225 Goat anti-chicken Alexa488 (Jackson ImmunoResearch, 103-545-155, 1:800) and  
226 Goat anti-mouse Cy3 (Jackson ImmunoResearch, 115-165-146, 1:500). 4',6-  
227 Diamidino-2-Phenylindole (DAPI) was applied in the third wash of PBT (1X PBS  
228 +0.1% Tween-20) at a final concentration of 1µg/µl. Slides were mounted in  
229 Fluoromount-G (Southern Biotech, 0100-01) with 34 X 60 cover slips (VWR,  
230 48393 106) and sealed with nail polish (Sally Hansen 30003298000). Confocal  
231 images were acquired with a Zeiss 710 confocal using Zen Software (Zeiss,  
232 Version 2.1 Black 2015) and processed using FIJI/Image J software (Version  
233 2.0.0-rc-67/1.52c).

234

235

236

## 237 **Results**

### 238 **Experimental Paradigm Overview**

239 To assess reporter activity in the retina, developing retinas from either  
240 chicken or mouse (Fig. 4C,D only) were isolated and electroporated with a DNA  
241 plasmid solution. Retinas were cultured ex vivo for 2 days, dissociated into single  
242 cells, and analyzed by flow cytometry. In all experiments, the activity of a cell-  
243 type specific EGFP reporter construct was assessed relative to a broadly active  
244 red fluorescent protein reporter construct. For both model animal systems, the  
245 ThrbCRM1 element was the main reporter plasmid used. ThrbCRM1 is a 40 base  
246 pair element containing a OC1 binding site and two potential Otx2 binding sites



247 (Fig. 1A)(Emerson et al., 2013). Two different forms of the vector were used -  
248 "4X" and "2X" versions that contained four and two copies of the ThrbCRM1  
249 element, respectively (Fig. 1B). The 4X version has a much greater overall  
250 activity level, likely due to the fact that there are twice as many binding sites for  
251 activating transcription factors and also that the four copies positions these  
252 binding sites further away from the basal promoter site, which may promote DNA  
253 looping regulatory events.

254

### 255 **Basal Vector Activity**

256 The Stagia3 plasmid was used for all experiments and has been reported  
257 to have low basal activity in qualitative assessments (Billings et al., 2010; Blixt  
258 and Hallböök, 2016; Emerson and Cepko, 2011; Wang et al., 2014). A flow  
259 cytometry assay was used to quantitatively assess the basal activity of the  
260 Stagia3 plasmid. In addition, to determine if the presence of other plasmids with  
261 strong cis-regulatory elements (the CAG promoter element in this instance) could  
262 trans-activate the Stagia3 reporter, an increasing concentration of a  
263 CAG::Nuclear  $\beta$ -galactosidase (CAG::Nuc $\beta$ -gal) plasmid was included. A third  
264 plasmid, CAG::mCherry was included at a constant concentration to standardize  
265 for the number of cells targeted by electroporation. Representative flow  
266 cytometry plots of retinas without any included CAG::Nuc $\beta$ -gal plasmid (Fig. S1A)  
267 or 200ng/ $\mu$ l CAG::Nuc $\beta$ -gal (Fig. S1B) show a large number of mCherry single-  
268 positive cells and very few cells that express EGFP. A plot of this data reveals  
269 that the basal vector used at the standard concentration of our ex vivo chicken  
270 experiments (160 ng/ $\mu$ l) had extremely low levels of EGFP expression in all  
271 samples. There was no statistically significant ectopic activation of EGFP even at  
272 the highest concentration of CAG-containing plasmids (Fig. S1C). This suggests  
273 that the Stagia3 reporter vector used in these experiments 1) possesses low  
274 basal activity 2) this basal activity is not altered by the presence of high  
275 concentrations of additional plasmids that possess strong regulatory elements.

276

### 277 **GFP reporter plasmid dose response curves**

278 The Stagia3 reporter plasmid has been used in a number of studies to test  
279 the activity of potential cis-regulatory elements. In previous studies, a specific  
280 concentration (100ng/ $\mu$ l -200ng/ $\mu$ l, depending on the study) has been repeatedly  
281 used in chicken and mouse retinas, though it has not been empirically  
282 determined whether this is the ideal concentration for assessment (Billings et al.,  
283 2010; Emerson et al., 2013; Emerson and Cepko, 2011; Mo et al., 2016; Wang et  
284 al., 2014). When considering the electroporation of reporter plasmids, it is likely  
285 that three variables affect the amount of EGFP expression: the number of cells  
286 targeted (the number of cells that take up plasmids), the number of plasmids  
287 incorporated into each individual cell, and whether the transcription factors that  
288 regulate the cis-regulatory element are present in limiting amounts. We first  
289 sought to quantitatively measure the first two variables by determining the  
290 number of cells in the electroporated population that have any detectable EGFP  
291 expression and also to measure the relative fluorescence levels of the EGFP-  
292 positive population. Chicken E5 retinas were electroporated with concentrations  
293 between 0 and 200ng/ $\mu$ l of either the 4X or 2X ThrbCRM1::EGFP reporters and a  
294 fixed concentration (100ng/ $\mu$ l) of a broadly expressed TdTomato construct  
295 (UbiqC::TdTomato, hereafter referred to as UbiqC::TdT) to use as an  
296 independent measure of electroporation efficiency. Depicted in Fig. 2A and B are  
297 examples of the distribution of cells when 160ng/ $\mu$ l of either the 4X or 2X  
298 versions of the ThrbCRM1::EGFP reporter is used. The percentage of cells out of  
299 the entire electroporated population that were EGFP-positive was plotted against  
300 the concentration of reporter plasmid (Fig. 2C,D). It was observed that for the 4X  
301 plasmid, the number of EGFP-positive cells increased logarithmically and  
302 reached an asymptote of 25% of the entire electroporated population at a  
303 concentration of 120ng/ $\mu$ l of the reporter plasmid. In contrast to the  
304 ThrbCRM1(4X) element, the ThrbCRM1(2X) element was approximately 10-fold  
305 less active than the ThrbCRM1(4X) element and a plot of the concentration curve  
306 revealed a sigmoidal instead of hyperbolic shape. In addition, the percentage of  
307 EGFP-positive cells continued to rise at concentrations of reporter plasmid  
308 beyond 120ng/ $\mu$ l, and a clear plateau point was not observable for the

309 concentrations tested. The observation that the 2X version was not saturating at  
310 the same concentrations as the 4X version suggests that the plateau effect  
311 observed for the 4X version is not simply a physical limit of the system, such as  
312 how much DNA can be electroporated. In addition, the plateau effect observed  
313 with ThrbCRM1(4X) suggests that there is a limit of 25% of cells at this time in  
314 development that can activate the ThrbCRM1 element. This is likely due to the  
315 number of cells co-expressing Otx2 and OC1.

316 In addition to calculating the total number of cells, the fluorescence intensity  
317 of the cells in that population was assessed by determining the distribution of the  
318 EGFP-positive cells across 5 Bins, with Bin1 being the weakest EGFP-  
319 expressing cells and Bin 5, the strongest expressing cells (Bin locations  
320 displayed in Fig. 2A,B). The distribution of cells relative to these Bins also  
321 stabilized at approximately 120ng/ $\mu$ l for the 4X version. At lower concentrations  
322 of reporter plasmids, most cells were located in the weakest EGFP-expressing  
323 Bin, which was Bin1. As the concentration of plasmids rose, there was an  
324 increase in the percentage of EGFP-positive cells in Bins 2, 3, and 4 and a  
325 subsequent decrease in the percentage of cells in Bin 1. The stabilization of  
326 these percentages suggest that there is a concentration threshold for the  
327 ThrbCRM1(4X)::EGFP reporter, such that the presence of more DNA plasmids in  
328 the electroporation mix does not lead to more cells activating the enhancer or for  
329 any of the cells to express more EGFP. Retinal cells electroporated with the 2X  
330 version expressed strikingly less EGFP compared to the 4X version. Almost no  
331 cells were found in Bins 3, 4, and 5 in the 2X version, whereas 18% and 8% of  
332 EGFP-positive cells were found with the 4X version.

333 The concentration curves for ThrbCRM1(X4) and ThrbCRM1(X2) shown in  
334 Fig. 2 (C and D) were generated in separate experiments, which can lead to  
335 experiment-specific differences based in embryo timing or flow cytometer  
336 settings. To confirm that the ThrbCRM1(X4) and ThrbCRM1(X2) constructs  
337 saturated at different points, the two constructs were tested in the same  
338 experiment across a range of concentrations for which the (X4) was saturated  
339 and the (X2) was not (120, 160, 200 ng/ $\mu$ l) (plotted separately in Fig. 2 G,H to

340 more easily allow for comparison of concentration differences irrespective of  
341 scale). Indeed, the concentration-dependent differences were observed and a  
342 comparison of the EGFP reporter activity of the 120 ng/ $\mu$ l and the 200 ng/ $\mu$ l  
343 concentrations of each plasmid was statistically different for the 2X version but  
344 not the 4X version. This confirms that the presence of 4 sets of binding  
345 sequences compared to 2 sets of binding sequences not only results in a larger  
346 EGFP-positive population with individual cells expressing more EGFP, but that  
347 the saturation points for these metrics are shifted to lower concentrations.

348

### 349 **Effects of misexpression of Otx2 and OC1 on the ThrbCRM1 population**

350 A previous study has identified the ThrbCRM1 element as containing  
351 predicted Onecut and Otx2 binding sites and a chromatin immunoprecipitation  
352 experiment confirmed their occupancy of this element in the developing chicken  
353 retina (Emerson et al., 2013). The current model is that these two transcription  
354 factors are co-expressed in a subset of retinal progenitor cells and both  
355 transcription factors are required for co-activation of ThrbCRM1 element-driven  
356 reporter expression (Emerson et al., 2013). Each of these transcription factors is  
357 also expressed without the other one in certain populations of retinal cells,  
358 including retinal progenitor cells (Buenaventura et al. 2018). To determine  
359 whether the population of retinal cells that activate the ThrbCRM1 element could  
360 be expanded, an experiment was performed in which retinas were co-  
361 electroporated with the ThrbCRM1(4X)::EGFP reporter, a UbiqC::TdT co-  
362 electroporation control, and plasmids that drive the broad expression of Otx2  
363 and/or OC1 transcription factors (using the CAG promoter). When either the Otx2  
364 or OC1 misexpression plasmids were introduced, an increase in the proportion of  
365 the electroporated population that activated the ThrbCRM1(4X)::EGFP reporter  
366 was observed, though these increases were not statistically significant (Fig. 3A-  
367 C). Inclusion of both the Otx2 and OC1 misexpression plasmids led to a  
368 statistically significant increase in the EGFP population (Fig. 3D). The percentage  
369 of the electroporated population that activates the ThrbCRM1 element under  
370 these conditions is plotted (Fig. 3E). One interpretation of these results, based on

371 the current model of ThrbCRM1 activation, is that misexpression of only one of  
372 the transcription factors, for instance just Otx2, expands the population of cells  
373 that activate ThrbCRM1 to those cells that normally only express OC1. The same  
374 would be true when OC1 is misexpressed, as normally Otx2-only cells would now  
375 activate the ThrbCRM1 element. Misexpression of both transcription factors  
376 leads to additional activation of the ThrbCRM1 element in cells that do not  
377 normally express either transcription factor. While the percentage of cells that  
378 activate ThrbCRM1 in response to the inclusion of both transcription factors  
379 increases dramatically, it does not lead to EGFP expression in all of the  
380 electroporated population. This could reflect a technical limitation of co-  
381 electroporation efficiency of all of these plasmids or it could reveal a biological  
382 limitation. Perhaps there are repressive transcription factors expressed in a  
383 subpopulation of cells that interact with ThrbCRM1 to keep it off even in the  
384 presence of Otx2 and OC1. Alternatively, there may be differentially expressed  
385 cofactors that are necessary to cooperate with Otx2 and OC1 to activate the  
386 ThrbCRM1 element.

387         The distribution of EGFP-positive cells in these transcription factor  
388 misexpression experiments was calculated using the same Bin system as  
389 described above in Fig. 2 (Fig. 3F). Interestingly, in retinas that had just Otx2 or  
390 OC1 misexpressed, the distribution of EGFP-positive cells across the five Bins  
391 was not statistically different from that of retinas with just the ThrbCRM1 reporter  
392 introduced. In contrast, in retinas with both transcription factors misexpressed,  
393 there was a statistically significant redistribution of EGFP-positive cells to Bins  
394 containing higher EGFP fluorescence. One interpretation of this result is that in  
395 retinas in which only one transcription factor was misexpressed, the new  
396 population of cells that activates ThrbCRM1 may be limited by the amount of the  
397 endogenous transcription factor that is present. Thus, while these cells may  
398 ectopically express the reporter, their fluorescence intensity would be similar to  
399 the cells that normally activate the reporter. However, in the case where both  
400 Otx2 and OC1 are introduced, these two proteins are now both present at higher

401 concentrations than their endogenous levels and this leads to a higher amount of  
402 EGFP production per cell that is quantitatively captured through this Bin analysis.

403 To determine the concentration effect of misexpressing the Otx2 and OC1  
404 factors on ThrbCRM1(X4) activity, plasmids encoding misexpression constructs  
405 for both transcription factors were introduced at similar relative proportions to  
406 each other. A dose-dependent increase in activity was observed with a  
407 distribution that suggested that even one-tenth the amounts of misexpressed  
408 Otx2 and OC1 that were used previously were sufficient to increase the output of  
409 reporter activity (Fig. 4A). While a clear plateau point in the total GFP-positive  
410 population was not observed by the highest amount of DNA tested (202 ng/ $\mu$ l),  
411 the bin distribution of EGFP fluorescent cells displayed a plateau beginning at  
412 approximately 75 ng/ $\mu$ l (Fig. 4A,B).

413

#### 414 **ThrbCRM1 Activity in the Mouse postnatal retina**

415 The ThrbCRM1 element is not active when electroporated into the mouse  
416 postnatal retina (Emerson et al., 2013). This is due to the fact that at this time,  
417 Onecut family members are only expressed in postmitotic cells, which are not  
418 targeted by electroporation in this paradigm. However, Otx2-positive cells can be  
419 targeted and co-electroporation of a CAG::OC1 misexpression plasmid with  
420 ThrbCRM1::EGFP leads to robust upregulation of EGFP reporter activity as well  
421 as upregulation of endogenous gene expression associated with cones and  
422 horizontal cells (Emerson et al., 2013). In support of the requirement of Otx2,  
423 simultaneous removal of Otx2 via a floxed allele leads to a concomitant decrease  
424 in cells with positive ThrbCRM1 activity (Emerson et al., 2013). These  
425 experiments did not determine the concentration requirements for OC1 and so an  
426 experiment to do so was designed. Postnatal day 0 (P0) mouse retinas were  
427 electroporated with a constant level of the ThrbCRM1(4X)::EGFP reporter and a  
428 UbiqC::TdT construct. A variable amount of CAG::OC1 was co-electroporated. A  
429 plot of this data revealed a CAG::OC1 concentration-dependent curve with a  
430 hyperbolic form that plateaued between 56ng/ $\mu$ l and 95ng/ $\mu$ l (Fig. 4C). Analysis  
431 of the EGFP intensity distribution of cells across Bins did not reveal major

432 differences between the lowest effective concentration (18ng/ $\mu$ l) and the highest  
433 (206ng/ $\mu$ l) (Fig. 4D). This suggests that the previously used concentration of  
434 100ng/ $\mu$ l was near the plateau point, but also reveals that much lower  
435 concentrations of the misexpression plasmid are biologically active and could be  
436 used to examine biological effects on cell fate.

437

### 438 **Mutational analysis of the ThrbCRM1 element**

439 A previous study identified OC1 and Otx2 binding sites in the ThrbCRM1  
440 element through chromatin immunoprecipitation and functionally tested the  
441 requirement of the OC1 binding site by mutating 5 of the core base pairs that  
442 compose this site (Emerson et al., 2013). However, only a qualitative readout  
443 was used to assess whether the OC1 binding site mutation affected the activity of  
444 the element and whether either of the two Otx2 binding sites was required was  
445 not determined. To examine the DNA sequence requirements more closely,  
446 specific point mutations were introduced to disrupt the putative Otx2 binding sites  
447 either alone (Otx2Mut1 or Otx2Mut2) or together (Otx2Mut1/2) (Fig. 5A). For both  
448 potential binding sites, the second Adenine of the motif was mutated as a recent  
449 high-throughput Selex study identified an Adenine in this position in all recovered  
450 Otx2 bound sequences (Jolma et al., 2013). A separate 3 base pair mutation was  
451 made in the predicted OC1 binding site (OCMut) (Fig. 5A). These mutations were  
452 made in the context of the ThrbCRM1(2X)::EGFP reporter where it was possible  
453 to efficiently introduce identical mutations into both copies of the ThrbCRM1  
454 element.

455 We first qualitatively tested these constructs in the context of the intact  
456 retina (Fig. 5B-G). ThrbCRM1(2X)::EGFP constructs were co-electroporated with  
457 a CAG::Nuc $\beta$ -gal construct to identify electroporated areas of the retina. Retinas  
458 were examined for EGFP and Nuc $\beta$ -gal reporter activity using confocal  
459 microscopy. As expected, a Stagia3 plasmid without additional cis-regulatory  
460 elements was unable to drive EGFP expression (Fig. 5B, B'). The wild-type  
461 construct showed a previously characterized pattern indicative of apically located  
462 photoreceptors, possible ThrbCRM1-active retinal progenitor cells and basally

463 located horizontal cells while the Nuc $\beta$ -gal was found throughout the retinal  
464 thickness (Fig. 5C, C'). Surprisingly, the number of EGFP-positive cells in the  
465 Otx2Mut1 electroporated retina was similar to that observed with the wildtype  
466 construct (Fig. 5D, D'). This sequence is highly conserved in vertebrates and  
467 matched the Otx2 binding site the most closely out of the two potential Otx2  
468 binding sites. In contrast, very few EGFP-expressing cells were observed in  
469 retinas electroporated with the Otx2Mut2, Otx2Mut1/2 and OCMut constructs  
470 compared to the retinas with the WT and Otx2Mut1 constructs (Fig. 5E-G').  
471 These results suggest that the sequence mutated in the Otx2Mut2 region, and  
472 not the Otx2Mut1 region, is the site that Otx2 binds in the ThrbCRM1 element.

473 To more quantitatively examine the effect of these mutations, each  
474 ThrbCRM1(2X)::EGFP construct was co-electroporated with UbiqC::TdT and  
475 analyzed by flow cytometry. The percentage of cells that activated the EGFP  
476 reporter was calculated and plotted (Fig. 5H). The wildtype version of  
477 ThrbCRM1(2X)::EGFP activated the reporter in just over 2% of the  
478 electroporated cells, in agreement with the low number of EGFP-expressing cells  
479 predicted from the concentration-dependent curves. In accord with the confocal  
480 microscopy results, the Otx2Mut1 reporter construct did not have a decrease in  
481 EGFP activity, and in fact had a slight increase. In contrast, mutation of the other  
482 potential Otx2 binding site (Otx2Mut2) led to a total abrogation of reporter activity  
483 and a plasmid carrying both mutations (Otx2Mut1/2) similarly had no EGFP  
484 expression. A plasmid carrying a mutation predicted to disrupt the OC1 binding  
485 site had a significant reduction in EGFP activity. Taken together, these results  
486 identify the critical Otx2 and OC1 binding sites for ThrbCRM1 element activity  
487 necessary for ThrbCRM1-driven reporter activity using both qualitative and  
488 quantitative assays.

489

#### 490 **Misexpression of OC1 or Otx2 can partially activate ThrbCRM1 mutant** 491 **elements**

492 To further test the requirements of the binding sites identified in the  
493 mutagenesis experiments, we determined whether misexpression of either OC1



494 or Otx2 could activate mutated ThrbCRM1 reporters that lacked OC1 or Otx2  
495 binding sites. Mutated ThrbCRM1 reporters were electroporated into chicken E5  
496 retinas in combination with Otx2 or OC1 misexpression plasmids and analyzed  
497 by flow cytometry. We first tested the ThrbCRM1[Otx21/2Mut]:EGFP plasmid,  
498 which lacks any consensus Otx2 binding sites (Fig. 6A). As expected,  
499 misexpression of Otx2 did not significantly activate EGFP expression from the  
500 ThrbCRM1[mutOtx1/2]:EGFP construct when compared to a control.  
501 Surprisingly, electroporation of CAG::OC1 with the ThrbCRM1[MutOtx1/2]:EGFP  
502 construct induced EGFP expression. This suggests that excess OC1 is able to  
503 activate the ThrbCRM1 element even under conditions in which consensus Otx2  
504 binding sites are absent. We next tested whether mutation of the OC binding site  
505 would affect the ability of the OC1 and Otx2 misexpression plasmids to activate  
506 the ThrbCRM1::EGFP plasmid. Similarly, Otx2 misexpression was able to  
507 significantly increase the amount of EGFP-positive cells from the OC mutated  
508 ThrbCRM1 plasmid, while the OC1 plasmid was unable to do so (Fig. 5B). This  
509 suggests that excess Otx2 can activate the ThrbCRM1 plasmid even when OC1  
510 consensus binding sites are lacking in the ThrbCRM1 element. Taken together,  
511 these results 1) provide further confirmation that the sites targeted for  
512 mutagenesis are in fact the relevant binding sites for their cognate transcription  
513 factors and 2) the mutated reporter plasmids can be activated under conditions in  
514 which the transcription factor with an intact binding site is misexpressed.

515         These experiments suggest that the necessity for one of the transcription  
516 factor binding sites can be overcome by misexpression of the other transcription  
517 factor that has an intact binding site. Two major possibilities exist to explain this  
518 phenomenon. One is that under normal conditions, co-expression of both  
519 transcription factors is needed to lead to stable occupancy of ThrbCRM1 and  
520 detectable reporter expression. High misexpression of one of the transcription  
521 factors could lead to stable occupancy and reporter activation by this  
522 transcription factor, independent of the other transcription factor. However, this  
523 explanation is not supported by previous data in which misexpression of either  
524 Otx2 or OC1 in tissues that lacked the other transcription factor were unable to

525 induce the ThrbCRM1 reporter (Emerson et al., 2013). A second possibility is  
526 that increased expression of one transcription factor may allow it to bind to its  
527 site, while recruiting the other transcription factor through a largely DNA-binding  
528 independent process. The lack of activity of ThrbCRM1 in tissues that only  
529 expressed one of the factors, no matter how highly expressed the other one,  
530 would be congruent with this hypothesis. To discriminate between these  
531 hypotheses, we repeated the previous misexpression experiments shown in Fig.  
532 6A and 6B, but also included increasing concentrations of the misexpression  
533 plasmid encoding the other, presumptive non-DNA binding, transcription factor.  
534 In both cases, co-electroporation of the plasmid encoding the transcription factor  
535 that lacks a consensus binding site on the mutated ThrbCRM1 element led to a  
536 concentration-dependent increase in EGFP expression from the mutated  
537 ThrbCRM1 reporter. In the case of the Otx2 mutant reporter, this was not a  
538 significant increase, while the OC mutant reporter was significant between the  
539 lowest and highest levels of CAG::OC1 tested. This suggests, that the OC1  
540 transcription factor is able to participate in activation of the ThrbCRM1 element  
541 even under conditions where a consensus binding site is lacking.

542

## 543 **Discussion**

544 The analysis of GRNs has yielded insights into fundamental  
545 developmental processes (Buecker and Wysocka, 2012; Peter and Davidson,  
546 2016). However, cis-regulatory elements are a critical component of GRNs that  
547 have proven difficult to analyze at the quantitative level. Most studies, done in  
548 vertebrates, are limited to the identification of these elements and assessing the  
549 effects of mutations through qualitative assays, though quantitative analysis  
550 through fluorescence measurements of whole tissue has been reported  
551 (Montana et al., 2013). Investigating the nature of interactions between DNA  
552 elements and transcription factors is often limited to in vitro assays where  
553 differences in binding partners and cellular context are lacking. Thus, the  
554 generation and use of quantitative assays in the context of developing tissue, as  
555 shown here, is of critical importance.

556 This study shows that the concentration of reporter plasmid is an  
557 important variable in experimental design, though this aspect has been ignored  
558 by the vast majority of previously published electroporation studies. In cases of  
559 sequence element mutagenesis, the ideal concentration of reporter plasmid is  
560 below the saturation point for reporter output. This concentration allows for the  
561 detection of either partial loss of activation or an increase in reporter activity due  
562 to loss of a repressor site. Use of reporter plasmid concentrations above the  
563 saturation point could obscure meaningful reporter output changes. This study  
564 also demonstrates that saturation points are likely to be unique for a given cis-  
565 regulatory element in a particular biological context. In addition to these important  
566 technical considerations, we also suggest that the quantitative flow cytometry  
567 assay used here reveals saturation kinetics that are a direct result of transcription  
568 factor occupancy of cis-regulatory elements. A confirmation of the direct binding  
569 kinetics of the transcription factors in these cells is not possible with current  
570 techniques, but the increased fluorescence levels at the per cell level induced by  
571 increased transcription factor expression supports this interpretation.

572 Similar to reporter plasmids, a systematic evaluation of misexpression  
573 plasmid concentration in electroporation experiments has not previously been  
574 examined. Given the demonstrated effects of transcription factor expression  
575 levels inducing specific cell fates (e.g. Gli levels in the spinal cord, or Otx2 levels  
576 in the retina)(Stamatakis et al., 2005; Wang et al., 2014), the concentration of  
577 misexpression plasmids should be considered in experimental design. For  
578 example, misexpression of OC1 in the postnatal retina is able to induce the  
579 earliest known steps of cone genesis in developing retinal cells that do not  
580 normally generate cones (Emerson et al., 2013). However, these cells appear  
581 stalled in their cone differentiation program, perhaps as a result of high levels of  
582 sustained OC1 expression in these cells. The present work shows that  
583 significantly lower concentrations of OC1 are sufficient to induce the ThrbCRM1  
584 element in the mouse retina. Thus, it will be of interest to assess whether these  
585 lower levels of misexpressed OC1 influence the progression of the cone  
586 differentiation program.

587           The small size of the ThrbCRM1 element and the known identity of two  
588 key regulators of its activity make this cis-regulatory element an ideal candidate  
589 to explore at the functional level. The limited sequence constrains the regulatory  
590 information that can be encoded and thus the complexity of its regulation. Otx2  
591 and OC1 are the only known regulators and the current model supports a  
592 necessary and sufficient model for their regulation of the ThrbCRM1 element  
593 (Emerson et al., 2013). The mutagenesis experiments performed here further  
594 support this model as sequences corresponding to one binding site for each of  
595 the transcription factors were found to be required for ThrbCRM1 activity. We  
596 interpret the ineffectiveness of misexpression of the corresponding transcription  
597 factor in eliciting reporter activity as further evidence that these mutations prevent  
598 most, if not all, of Otx2 and OC1 binding. However, we cannot rule out a small  
599 amount of binding that is perhaps facilitated by the presence of the other  
600 transcription factor with an intact binding site. Thus, while the misexpression  
601 experiments in the context of mutated binding sites supports a model where OC1  
602 is recruited through protein-protein interactions with Otx2 and modulates  
603 transcription irrespective of DNA-binding, this assay may reveal the weak binding  
604 affinity of OC1 for the mutated binding site. Regardless, the dose-dependence of  
605 this effect indicates a co-regulatory function for these two proteins. This could  
606 reflect a physical interaction between these proteins, which is likely given the  
607 proximity of the Otx2 and OC1 binding sites.

608           This paradigm allowed us to test the necessity of sequence elements in  
609 the ThrbCRM1 element. Interestingly, only one of the two potential Otx2 binding  
610 sites appeared to be necessary for the activity of the ThrbCRM1 element.  
611 Whether the spacing and orientation of this Otx2 site relative to the OC1 binding  
612 site is important will require further investigation. In addition to mutagenesis  
613 experiments for this purpose, it will be interesting to identify other cis-regulatory  
614 elements co-regulated by Otx2 and OC1 and examine their binding sites with  
615 regards to specific sequences, orientation, and spacing. The likely Otx2 binding  
616 site (AAATCC) differs from the canonical monomeric site identified in *in vitro*  
617 Selex studies (TAATCC)(Jolma et al., 2013). In this Selex study, sequences

618 containing Adenine in the first position were recovered, suggesting that A can be  
619 tolerated by Otx2 binding. However, though an A represented the second most  
620 enriched base after T, this was only 3.3% of all sequences. Interestingly, the  
621 same Selex study identified presumed Otx2 dimer-bound sequences and the  
622 sequences that correlated to the individual units differed in sequence from those  
623 bound by the monomer. A similar divergence in monomer versus dimer-bound  
624 sequence specificities has also been suggested for the Otx2-related transcription  
625 factor Crx, implying that the binding specificities of the Otx2 class of transcription  
626 factors can differ depending on their interactions with DNA as a monomer or a  
627 dimer (Hughes et al., 2017; Kwasnieski et al., 2012). We speculate that the  
628 AAATCC sequence could represent the preferred sequence for Otx2 only when  
629 present in a complex with OC1. Such a shift in binding specificity has been  
630 referred to as "latent specificity" and observed previously for Drosophila Hox  
631 genes when in complex with the cofactor Extradenticle (Slattery et al., 2011).  
632 This could provide a potential explanation for the high degree of conservation of  
633 an A in the first position that is found in the homologous ThrbCRM1 elements  
634 across the phylum chordata.

635 In summary, this study quantitatively assesses the effects of multiple  
636 experimental parameters on the activity of the restricted RPC ThrbCRM1  
637 element. This has provided insights not only into the specific sequence  
638 requirements and transcription factor/DNA binding dynamics for this particular  
639 element, but more generally into the use of electroporation to investigate cis-  
640 regulatory elements during development.

641

642

### 643 **Acknowledgements**

644 The  $\beta$ -galactosidase antibody developed by Joshua Sanes was obtained from  
645 the Developmental Studies Hybridoma Bank developed under the auspices of  
646 the NICHD and maintained by the Department of Biology at The University of  
647 Iowa. We thank Andre Washington for excellent technical help in tissue  
648 processing. Jeffrey Walker and Jorge Morales provided valuable technical

649 support with flow cytometry and confocal microscopy. Diego Buenaventura  
650 provided essential input on statistical methodology. We thank Julianna LeMieux  
651 for editing/proofreading the manuscript.

652

### 653 **Competing interests**

654 No competing interests declared

655

### 656 **Funding**

657 Funding support was provided by National Institutes of Health, National Eye  
658 Institute grant R01EY024982 (to M.E.) and National Institute on Minority Health  
659 and Disparities grant 3G12MD007603-30S2 (to CCNY). The content is solely the  
660 responsibility of the authors and does not necessarily represent the official views  
661 of the National Eye Institute, the National Institute on Minority Health and Health  
662 Disparities or the National Institutes of Health.

663

### 664 **Ethics approval and consent to participate**

665 All animal procedures were approved by The City College of New York  
666 Institutional Animal Care and Use Committee under protocol 932.

667

668

### 669 **References**

- 670 Bery, A., Martynoga, B., Guillemot, F., Joly, J.-S., Rétaux, S., 2014.  
671 Characterization of enhancers active in the mouse embryonic cerebral  
672 cortex suggests Sox/Pou cis-regulatory logics and heterogeneity of  
673 cortical progenitors. *Cereb. Cortex N. Y. N* 1991 24, 2822–2834.  
674 <https://doi.org/10.1093/cercor/bht126>  
675 Billings, N.A., Emerson, M.M., Cepko, C.L., 2010. Analysis of thyroid response  
676 element activity during retinal development. *PloS One* 5, e13739.  
677 <https://doi.org/10.1371/journal.pone.0013739>  
678 Blixt, M.K.E., Hallböök, F., 2016. A regulatory sequence from the retinoid X  
679 receptor  $\gamma$  gene directs expression to horizontal cells and photoreceptors  
680 in the embryonic chicken retina. *Mol. Vis.* 22, 1405–1420.  
681 Brzezinski, J.A., 4th, Kim, E.J., Johnson, J.E., Reh, T.A., 2011. *Ascl1* expression  
682 defines a subpopulation of lineage-restricted progenitors in the  
683 mammalian retina. *Dev. Camb. Engl.* 138, 3519–3531.  
684 <https://doi.org/10.1242/dev.064006>

- 685 Brzezinski, J.A., Prasov, L., Glaser, T., 2012. Math5 defines the ganglion cell  
686 competence state in a subpopulation of retinal progenitor cells exiting the  
687 cell cycle. *Dev. Biol.* 365, 395–413.  
688 <https://doi.org/10.1016/j.ydbio.2012.03.006>
- 689 Buecker, C., Wysocka, J., 2012. Enhancers as information integration hubs in  
690 development: lessons from genomics. *Trends Genet. TIG* 28, 276–284.  
691 <https://doi.org/10.1016/j.tig.2012.02.008>
- 692 Chang, J.C., Meredith, D.M., Mayer, P.R., Borromeo, M.D., Lai, H.C., Ou, Y.-H.,  
693 Johnson, J.E., 2013. Prdm13 mediates the balance of inhibitory and  
694 excitatory neurons in somatosensory circuits. *Dev. Cell* 25, 182–195.  
695 <https://doi.org/10.1016/j.devcel.2013.02.015>
- 696 Cherry, T.J., Wang, S., Bormuth, I., Schwab, M., Olson, J., Cepko, C.L., 2011.  
697 NeuroD factors regulate cell fate and neurite stratification in the  
698 developing retina. *J. Neurosci. Off. J. Soc. Neurosci.* 31, 7365–7379.  
699 <https://doi.org/10.1523/JNEUROSCI.2555-10.2011>
- 700 De la Huerta, I., Kim, I.-J., Voinescu, P.E., Sanes, J.R., 2012. Direction-selective  
701 retinal ganglion cells arise from molecularly specified multipotential  
702 progenitors. *Proc. Natl. Acad. Sci.* 109, 17663–17668.  
703 <https://doi.org/10.1073/pnas.1215806109>
- 704 de Melo, J., Peng, G.-H., Chen, S., Blackshaw, S., 2011. The Spalt family  
705 transcription factor Sall3 regulates the development of cone  
706 photoreceptors and retinal horizontal interneurons. *Dev. Camb. Engl.* 138,  
707 2325–2336. <https://doi.org/10.1242/dev.061846>
- 708 Emerson, M.M., Cepko, C.L., 2011. Identification of a retina-specific Otx2  
709 enhancer element active in immature developing photoreceptors. *Dev.*  
710 *Biol.* 360, 241–255. <https://doi.org/10.1016/j.ydbio.2011.09.012>
- 711 Emerson, M.M., Surzenko, N., Goetz, J., Trimarchi, J.M., Cepko, C., 2013. Otx2  
712 and Onecut1 Promote the Fates of Cone Photoreceptors and Horizontal  
713 Cells and Repress Rod Photoreceptors. *Dev. Cell* 26, 59–72.
- 714 Godinho, L., Williams, P.R., Claassen, Y., Provost, E., Leach, S.D., Kamermans,  
715 M., Wong, R.O.L., 2007. Nonapical symmetric divisions underlie horizontal  
716 cell layer formation in the developing retina in vivo. *Neuron* 56, 597–603.  
717 <https://doi.org/10.1016/j.neuron.2007.09.036>
- 718 Hafler, B.P., Surzenko, N., Beier, K.T., Punzo, C., Trimarchi, J.M., Kong, J.H.,  
719 Cepko, C.L., 2012. Transcription factor Olig2 defines subpopulations of  
720 retinal progenitor cells biased toward specific cell fates. *Proc. Natl. Acad.*  
721 *Sci. U. S. A.* 109, 7882–7887. <https://doi.org/10.1073/pnas.1203138109>
- 722 Holt, C.E., Bertsch, T.W., Ellis, H.M., Harris, W.A., 1988. Cellular determination  
723 in the *Xenopus* retina is independent of lineage and birth date. *Neuron* 1,  
724 15–26.
- 725 Hothorn, T., Bretz, F., Westfall, P., 2008. Simultaneous inference in general  
726 parametric models. *Biom. J. Biom. Z.* 50, 346–363.  
727 <https://doi.org/10.1002/bimj.200810425>
- 728 Hsiau, T.H.-C., Diaconu, C., Myers, C.A., Lee, J., Cepko, C.L., Corbo, J.C., 2007.  
729 The cis-regulatory logic of the mammalian photoreceptor transcriptional  
730 network. *PLoS One* 2, e643. <https://doi.org/10.1371/journal.pone.0000643>

- 731 Hughes, A.E.O., Enright, J.M., Myers, C.A., Shen, S.Q., Corbo, J.C., 2017. Cell  
732 Type-Specific Epigenomic Analysis Reveals a Uniquely Closed Chromatin  
733 Architecture in Mouse Rod Photoreceptors. *Sci. Rep.* 7, 43184.  
734 <https://doi.org/10.1038/srep43184>
- 735 JASP Team, 2018. JASP Team (2018).
- 736 Jolma, A., Yan, J., Whittington, T., Toivonen, J., Nitta, K.R., Rastas, P.,  
737 Morgunova, E., Enge, M., Taipale, M., Wei, G., Palin, K., Vaquerizas,  
738 J.M., Vincentelli, R., Luscombe, N.M., Hughes, T.R., Lemaire, P.,  
739 Ukkonen, E., Kivioja, T., Taipale, J., 2013. DNA-Binding Specificities of  
740 Human Transcription Factors. *Cell* 152, 327–339.  
741 <https://doi.org/10.1016/j.cell.2012.12.009>
- 742 Kim, D.S., Matsuda, T., Cepko, C.L., 2008. A core paired-type and POU  
743 homeodomain-containing transcription factor program drives retinal bipolar  
744 cell gene expression. *J. Neurosci. Off. J. Soc. Neurosci.* 28, 7748–7764.  
745 <https://doi.org/10.1523/JNEUROSCI.0397-08.2008>
- 746 Kwasniewski, J.C., Mogno, I., Myers, C.A., Corbo, J.C., Cohen, B.A., 2012.  
747 Complex effects of nucleotide variants in a mammalian cis-regulatory  
748 element. *Proc. Natl. Acad. Sci. U. S. A.* 109, 19498–19503.  
749 <https://doi.org/10.1073/pnas.1210678109>
- 750 La Torre, A., Georgi, S., Reh, T.A., 2013. Conserved microRNA pathway  
751 regulates developmental timing of retinal neurogenesis. *Proc. Natl. Acad.*  
752 *Sci. U. S. A.* 110, E2362–2370. <https://doi.org/10.1073/pnas.1301837110>
- 753 Maguire, J.E., Pandey, A., Wu, Y., Di Gregorio, A., 2018. Investigating  
754 Evolutionarily Conserved Molecular Mechanisms Controlling Gene  
755 Expression in the Notochord. *Adv. Exp. Med. Biol.* 1029, 81–99.  
756 [https://doi.org/10.1007/978-981-10-7545-2\\_8](https://doi.org/10.1007/978-981-10-7545-2_8)
- 757 Matsuda, T., Cepko, C.L., 2007. Controlled expression of transgenes introduced  
758 by in vivo electroporation. *Proc. Natl. Acad. Sci. U. S. A.* 104, 1027–1032.  
759 <https://doi.org/10.1073/pnas.0610155104>
- 760 Matsuda, T., Cepko, C.L., 2004. Electroporation and RNA interference in the  
761 rodent retina in vivo and in vitro. *Proc. Natl. Acad. Sci. U. S. A.* 101, 16–  
762 22. <https://doi.org/10.1073/pnas.2235688100>
- 763 Mattar, P., Ericson, J., Blackshaw, S., Cayouette, M., 2015. A conserved  
764 regulatory logic controls temporal identity in mouse neural progenitors.  
765 *Neuron* 85, 497–504. <https://doi.org/10.1016/j.neuron.2014.12.052>
- 766 Mills, T.S., Eliseeva, T., Bersie, S.M., Randazzo, G., Nahreini, J., Park, K.U.,  
767 Brzezinski, J.A., 2017. Combinatorial regulation of a Blimp1 (Prdm1)  
768 enhancer in the mouse retina. *PloS One* 12, e0176905.  
769 <https://doi.org/10.1371/journal.pone.0176905>
- 770 Mo, A., Luo, C., Davis, F.P., Mukamel, E.A., Henry, G.L., Nery, J.R., Urich, M.A.,  
771 Picard, S., Lister, R., Eddy, S.R., Beer, M.A., Ecker, J.R., Nathans, J.,  
772 2016. Epigenomic landscapes of retinal rods and cones. *eLife* 5, e11613.  
773 <https://doi.org/10.7554/eLife.11613>
- 774 Montana, C.L., Myers, C.A., Corbo, J.C., 2013. Quantifying the activity of cis-  
775 regulatory elements in the mouse retina by explant electroporation.



- 776 Methods Mol. Biol. Clifton NJ 935, 329–340. [https://doi.org/10.1007/978-1-62703-080-9\\_23](https://doi.org/10.1007/978-1-62703-080-9_23)
- 777
- 778 Onishi, A., Peng, G.-H., Poth, E.M., Lee, D.A., Chen, J., Alexis, U., de Melo, J.,
- 779 Chen, S., Blackshaw, S., 2010. The orphan nuclear hormone receptor
- 780 ERRbeta controls rod photoreceptor survival. Proc. Natl. Acad. Sci. U. S.
- 781 A. 107, 11579–11584. <https://doi.org/10.1073/pnas.1000102107>
- 782 Peter, I.S., Davidson, E.H., 2016. Implications of Developmental Gene
- 783 Regulatory Networks Inside and Outside Developmental Biology. Curr.
- 784 Top. Dev. Biol. 117, 237–251. <https://doi.org/10.1016/bs.ctdb.2015.12.014>
- 785 Rickels, R., Shilatifard, A., 2018. Enhancer Logic and Mechanics in Development
- 786 and Disease. Trends Cell Biol. 28, 608–630.
- 787 <https://doi.org/10.1016/j.tcb.2018.04.003>
- 788 Rompani, S.B., Cepko, C.L., 2008. Retinal progenitor cells can produce restricted
- 789 subsets of horizontal cells. Proc. Natl. Acad. Sci. U. S. A. 105, 192–197.
- 790 <https://doi.org/10.1073/pnas.0709979104>
- 791 Slattery, M., Riley, T., Liu, P., Abe, N., Gomez-Alcala, P., Dror, I., Zhou, T., Rohs,
- 792 R., Honig, B., Bussemaker, H.J., Mann, R.S., 2011. Cofactor Binding
- 793 Evokes Latent Differences in DNA Binding Specificity between Hox
- 794 Proteins. Cell 147, 1270–1282. <https://doi.org/10.1016/j.cell.2011.10.053>
- 795 Stamatakis, D., Ulloa, F., Tsoni, S.V., Mynett, A., Briscoe, J., 2005. A gradient of
- 796 Gli activity mediates graded Sonic Hedgehog signaling in the neural tube.
- 797 Genes Dev. 19, 626–641. <https://doi.org/10.1101/gad.325905>
- 798 Team, R.C., 2018. R: A language and environment for statistical computing. R
- 799 Foundation for Statistical Computing. 2018.
- 800 Turner, D.L., Snyder, E.Y., Cepko, C.L., 1990. Lineage-independent
- 801 determination of cell type in the embryonic mouse retina. Neuron 4, 833–
- 802 845.
- 803 Uchikawa, M., Takemoto, T., Kamachi, Y., Kondoh, H., 2004. Efficient
- 804 identification of regulatory sequences in the chicken genome by a
- 805 powerful combination of embryo electroporation and genome comparison.
- 806 Mech. Dev. 121, 1145–1158. <https://doi.org/10.1016/j.mod.2004.05.009>
- 807 Wang, S., Sengel, C., Emerson, M.M., Cepko, C.L., 2014. A gene regulatory
- 808 network controls the binary fate decision of rod and bipolar cells in the
- 809 vertebrate retina. Dev. Cell 30, 513–527.
- 810 <https://doi.org/10.1016/j.devcel.2014.07.018>
- 811 Wetts, R., Fraser, S.E., 1988. Multipotent precursors can give rise to all major
- 812 cell types of the frog retina. Science 239, 1142–1145.
- 813 Zeng, H., Sanes, J.R., 2017. Neuronal cell-type classification: challenges,
- 814 opportunities and the path forward. Nat. Rev. Neurosci. 18, 530–546.
- 815 <https://doi.org/10.1038/nrn.2017.85>
- 816

## 817 **Figure Legends**

### 818 **Figure 1. Schematic of the ThrbCRM1 Reporter and Sequence Elements (A)**

819 Sequence of one copy of the ThrbCRM1 element and the corresponding binding

820 sites of Otx2 and Onecut1 (OC1). (\*) indicates conservation as defined in  
821 Emerson et al. 2013. (B) Schematic representation of the ThrbCRM1 construct  
822 with 4X or 2X copies of the 40 base pair ThrbCRM1 element shown as the grey  
823 box. Predicted Otx2 binding sites are indicated in yellow, and the predicted OC1  
824 binding site is indicated in blue.

825

826 **Figure 2. Effects of ThrbCRM1::GFP Plasmid Concentration and ThrbCRM1**

827 **Element Copy Number on Reporter Activity** (A,B) Representative flow  
828 cytometry plots of dissociated cells from chick retinas receiving 160 ng/μl of  
829 either the ThrbCRM1(4X) (A) or ThrbCRM1(2X) (B) EGFP reporter plasmid. Bins  
830 representing levels of EGFP fluorescence intensity are shown as vertical boxes  
831 and denoted on the right side of the plot. (C,D) Graphs of the percentage of total  
832 percentage of EGFP-positive cells along the y-axis relative to the concentration  
833 of the 4X (C) or 2X (D) ThrbCRM1::EGFP reporter plasmid on the x-axis. Arrow  
834 denotes 120ng/μl of reporter plasmid (E,F) A graph of the percentage of EGFP-  
835 positive cells in each bin out of the total number of EGFP-positive cells along the  
836 y-axis and the concentration of the reporter plasmid shown along the x-axis. Bin  
837 1 through bin 5 represent increasing amount of EGFP fluorescence (bin 1 = least  
838 amount of EGFP fluorescence; bin 1 = dark blue; bin 2 = red; bin 3 = light green;  
839 bin 4 = purple; bin 5 = aqua) Bin key in panel F also applies to panel E (G,H)  
840 Graphs of the percentage of total EGFP-positive cells along the y-axis relative to  
841 the concentration of the 4X (G) or 2X (H) ThrbCRM1::EGFP reporter plasmid.  
842 Samples from G and H were generated in a single experiment, but plotted in  
843 separate graphs. Error bars represent 95% confidence intervals. Asterisk  
844 identifies a statistically significant p-value<0.5 using the Mann-Whitney t-test. n.s.  
845 denotes no significance.

846

847 **Figure 3 Effects of misexpression of Otx2 and/or OC1 on ThrbCRM1::EGFP**

848 **Activity** (A-D) Representative flow cytometry plots of dissociated cells from  
849 chicken retinas receiving Ubiquitin::TdTomato reporter plasmid, 4XThrbCRM1::EGFP  
850 reporter plasmid and either TE (no DNA) (A), CAG::Otx2 (B), CAG::OC1 (C) or

851 CAG::OC1 and CAG::Otx2 (D). (E) A plot of the percentage of  
852 ThrbCRM1::EGFP-positive cells in response to electroporation of the CAG  
853 plasmid shown along the x-axis. Average values are based on 4 retinas. (F) A  
854 graph of the percentage of ThrbCRM1::EGFP-positive cells in each bin (bins 1-5  
855 as shown in A with bin 1 = least amount of EGFP fluorescence) for each of the 4  
856 conditions. Plotted values represent the averages of 4 retinas and error bars  
857 represent 95% confidence intervals. A one-way Anova with a post-hoc Dunnetts  
858 statistical test was used to compare each of the misexpression groups to that of  
859 the TE group. \* represents  $p < 0.05$ , \*\* represents  $p < 0.01$  and \*\*\* represents  
860  $p < 0.001$ .

861

862 **Figure 4. Effects of Transcription Factor Misexpression Plasmid**  
863 **Concentration on Reporter Activity in Mouse and Chick Retinas** (A) A graph  
864 of the percentage of electroporated cells in chicken E5 retina that are EGFP-  
865 positive after introduction of 160 ng/ $\mu$ l ThrbCRM1::EGFP reporter plasmid and  
866 varying concentrations of the CAG::Otx2 and CAG::OC1 misexpression  
867 plasmids. The x-axis displays concentrations in nanograms/microliter (ng/ $\mu$ l) of  
868 each of the misexpression plasmids. (B) A graph of the percentage of EGFP-  
869 positive cells in each bin (bins 1-5). Bin 1 through bin 5 represent increasing  
870 amount of EGFP fluorescence (bin 1 = least amount of EGFP fluorescence and  
871 bin 5 = the most amount of EGFP fluorescence). (C) A graph of the amount of  
872 cells positive for EGFP in a mouse P0 retina electroporated with 200 ng/ $\mu$ l of  
873 ThrbCRM1::EGFP reporter plasmid and varying concentrations of the CAG::OC1  
874 misexpression plasmids. The x-axis displays concentrations in  
875 nanograms/microliter (ng/ $\mu$ l) of CAG::OC1 plasmid. (D) A graph of the amount of  
876 cells in each bin (bins 1-5) of the data plotted in C.

877

878 **Figure 5. Mutational Analysis of the ThrbCRM1 Element** (A) Schematic and  
879 sequence representation of the ThrbCRM1 element. The putative OTX2 binding  
880 sites are highlighted in yellow and the OC1 binding site is highlighted in blue. The  
881 letters in red represent the mutation of the corresponding nucleotide. (B-G, 'B-

882 **G'**) Confocal z-stack images of chicken retinas electroporated with CAG::Nuc $\beta$ -  
883 gal and the ThrbCRM1::EGFP plasmid shown above and immunofluorescent  
884 detection of EGFP (green), Nuc $\beta$ -gal (red) and DAPI (blue). **(B-G)** Merged  
885 images **(B'-G')** EGFP signal only **(H)** Results of a flow cytometry evaluation of  
886 EGFP fluorescence displayed as a graph of the percentage of cells positive for  
887 the ThrbCRM1-driven EGFP reporter (x-axis). \*\*\* denotes statistical significance  
888  $p < 0.001$  as determined by a one-way Anova with a post-hoc Dunnetts test. The  
889 electroporated Stagia3 reporter is shown to the left of each bar. Scale bar in  
890 panel B represents 20 $\mu$ m and applies to all image panels.

891

892 **Figure 6. Activity of mutant ThrbCRM1::EGFP reporter in response to**  
893 **misexpression of Otx2 and/or OC1.** (A-B) Graphs of the percentage of  
894 electroporated cells positive for EGFP after introduction into E5 chick retinas of  
895 160 ng/ $\mu$ l of ThrbCRM1::EGFP reporter plasmid with either no other plasmid, 100  
896 ng/ $\mu$ l of Otx2 misexpression plasmid, or 100 ng/ $\mu$ l of OC1 misexpression  
897 plasmid. (C) A graph of the percentage of EGFP-positive cells (y-axis) in the  
898 electroporated population after electroporation of E5 chick retinas with the  
899 ThrbCRM1 mutant reporter plasmid and the concentration of the Otx2 and OC1  
900 misexpression plasmids (ng/ $\mu$ l) shown along the x-axis for each condition. Error  
901 bars represent 95% confidence intervals. Statistical significance is denoted by  
902 \* $p < 0.05$  or \*\* $p < 0.01$  as determined by a one-way Anova with a post-hoc  
903 Dunnetts test.

904

905 **Supplemental Figure 1. Assessment of plasmid transactivation on Stagia3**  
906 **reporter plasmids.** **(A-B)** Representative flow cytometry plots of dissociated  
907 cells from chicken retinas electroporated with an empty Stagia3 reporter plasmid,  
908 a CAG::mCherry co-electroporation control, and another plasmid containing  
909 either 0 ng/ $\mu$ l (A) or 200 ng/ $\mu$ l (B) of an additional plasmid containing the CAG  
910 element without a fluorescent readout. Stagia3 reporter activity is plotted along  
911 the y-axis and the CAG::mCherry co-electroporation control along the x-axis. **(C)**  
912 Quantification of Stagia3 reporter plasmid activity plotted along the y-axis as the

913 percentage of EGFP-positive in the electroporated population in the presence of  
914 varying concentrations of CAG co-electroporated plasmid in  
915 nanograms/microliter along the x-axis. Error bars represent 95% confidence  
916 intervals. There was no statistically significant effect of any concentration of  
917 additional CAG plasmid concentration compared to the baseline as assessed by  
918 a one-way Anova with a post-hoc Dunnetts test.  
919  
920  
921

Figure 1

**A**

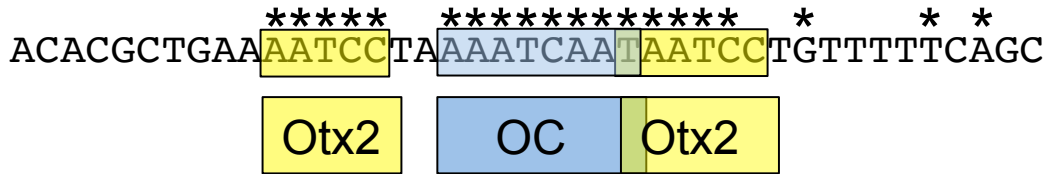

**B**

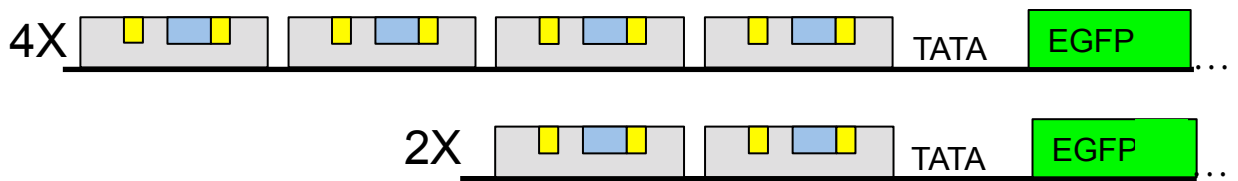

**Figure 2**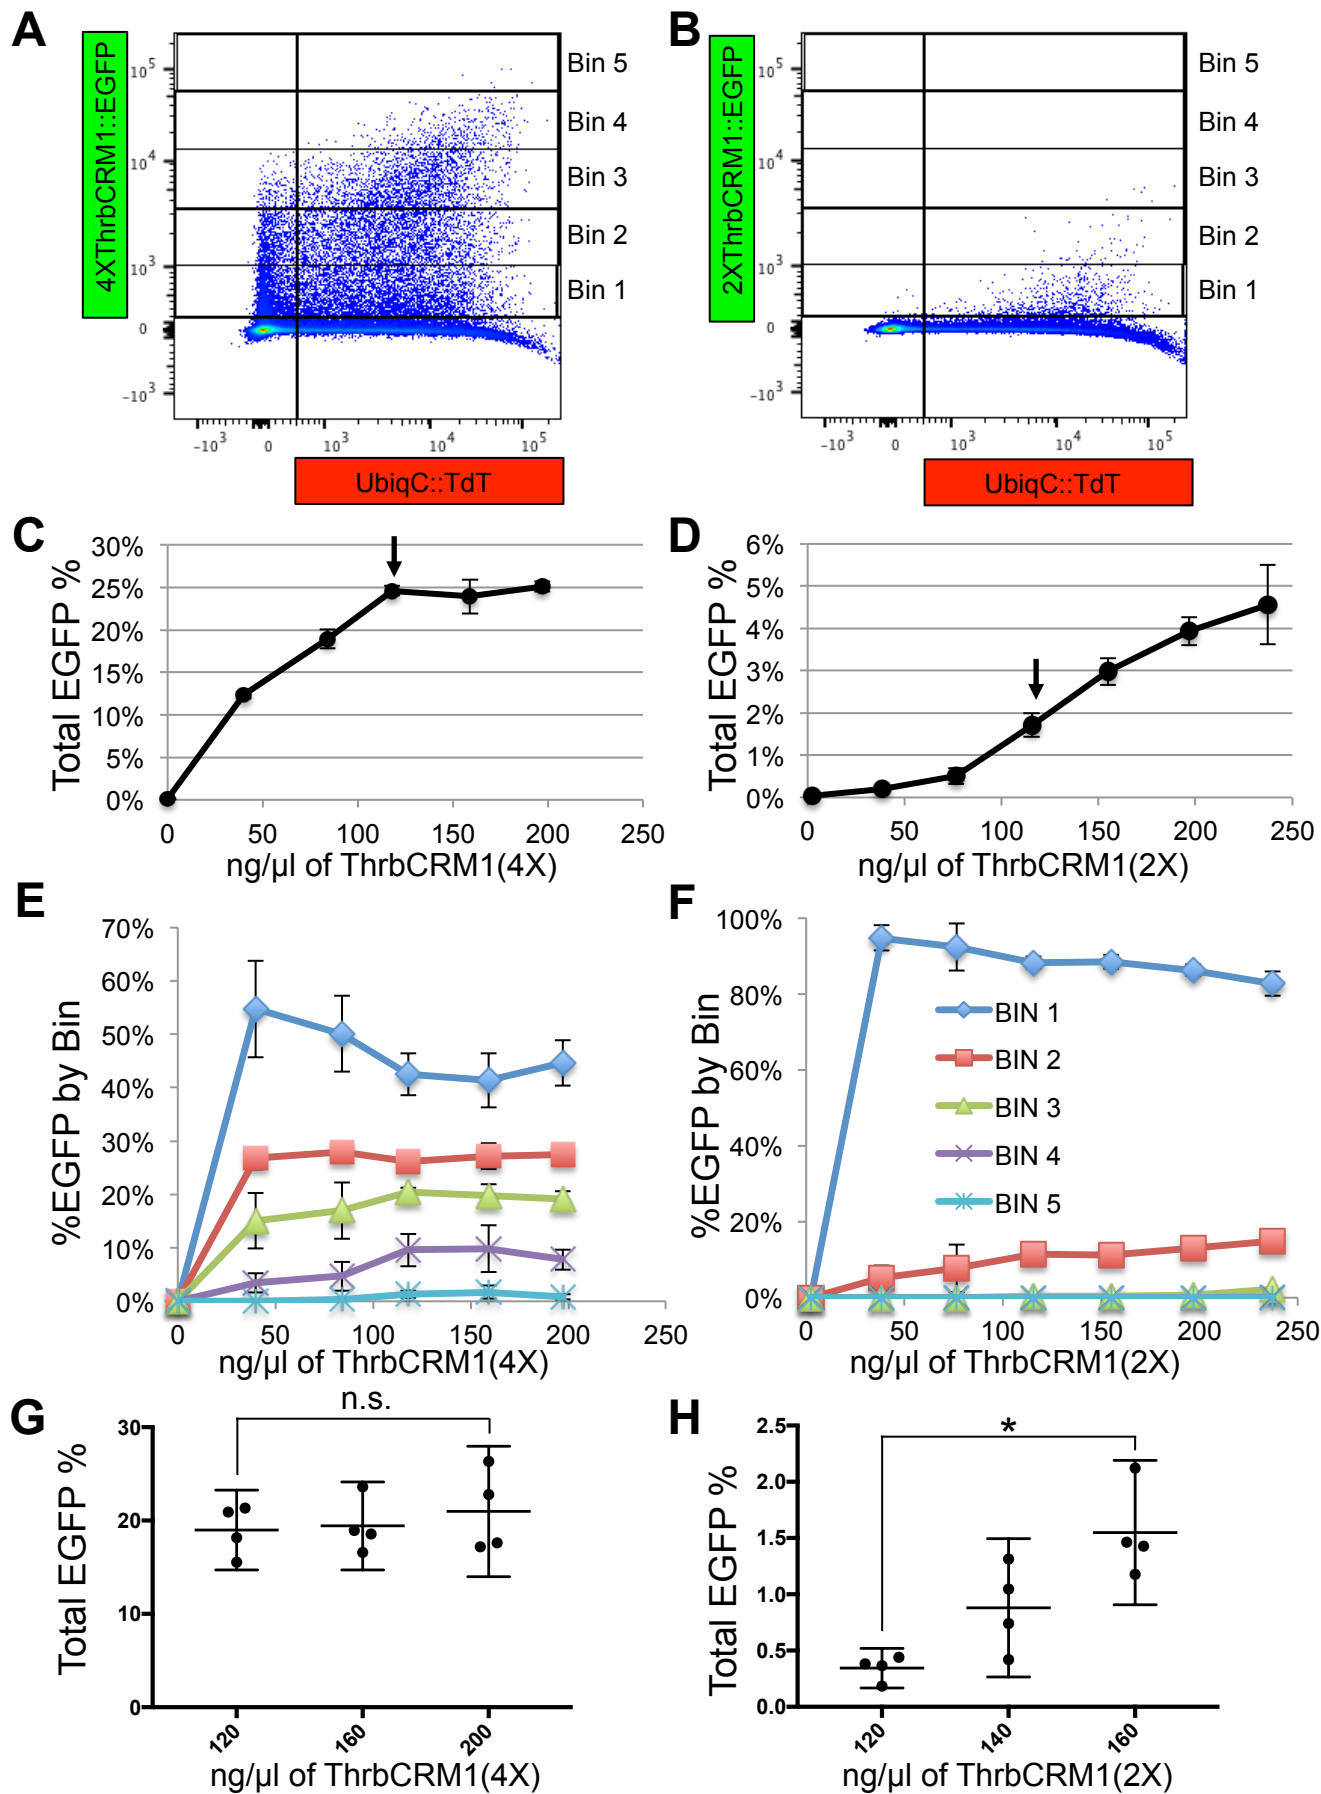

# Figure 3

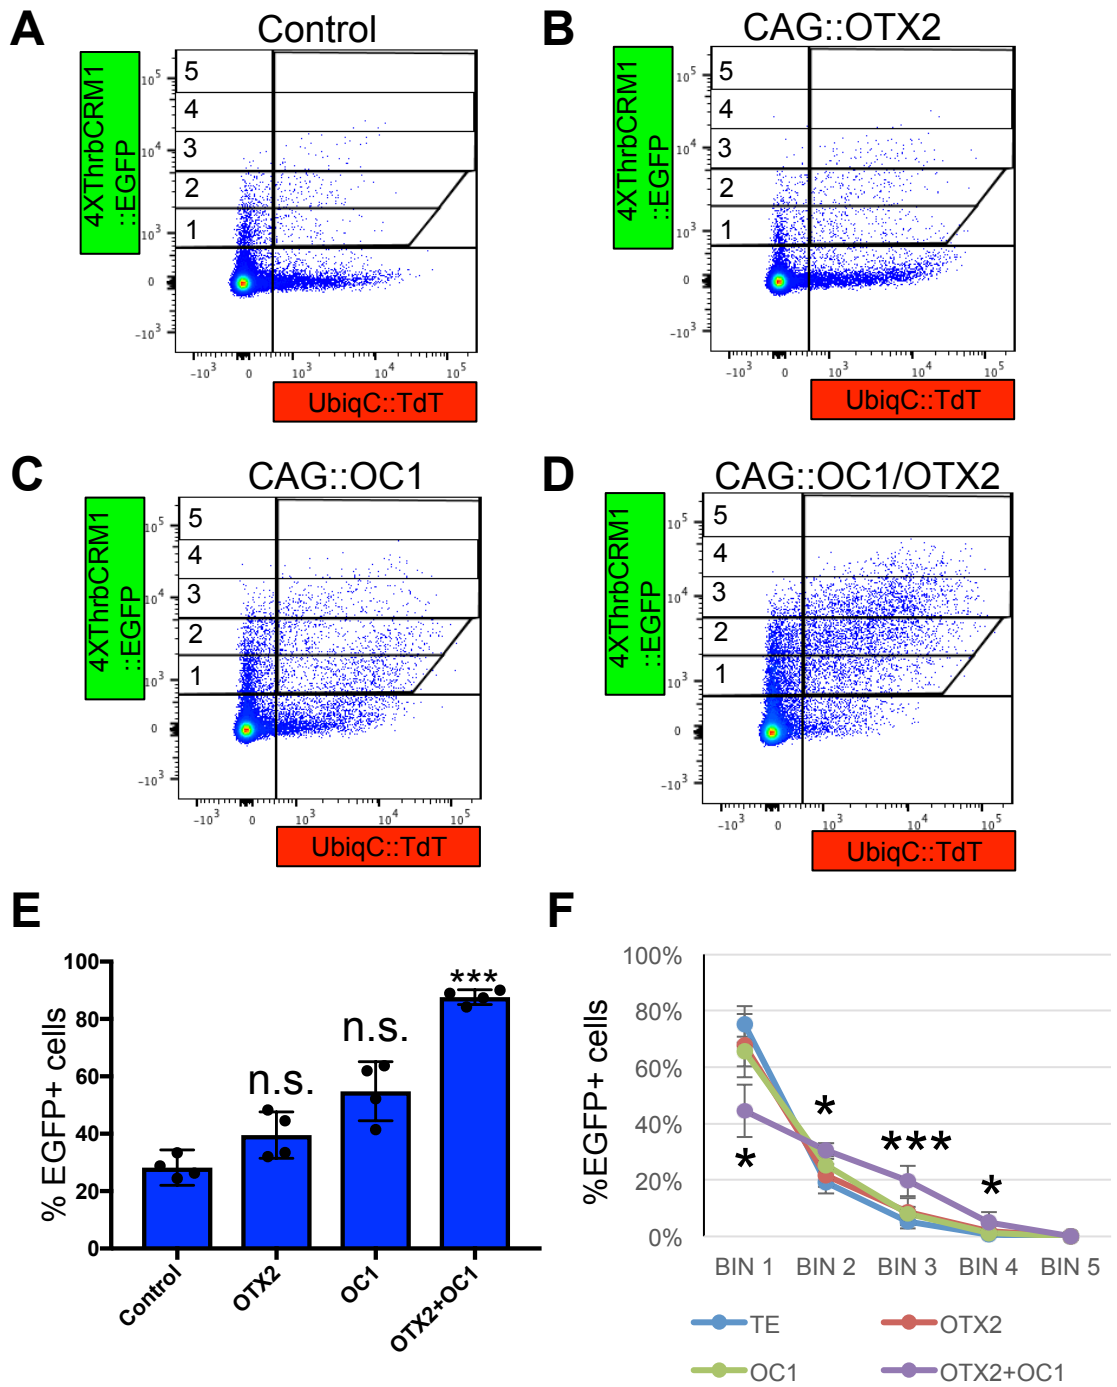



**Figure 4**

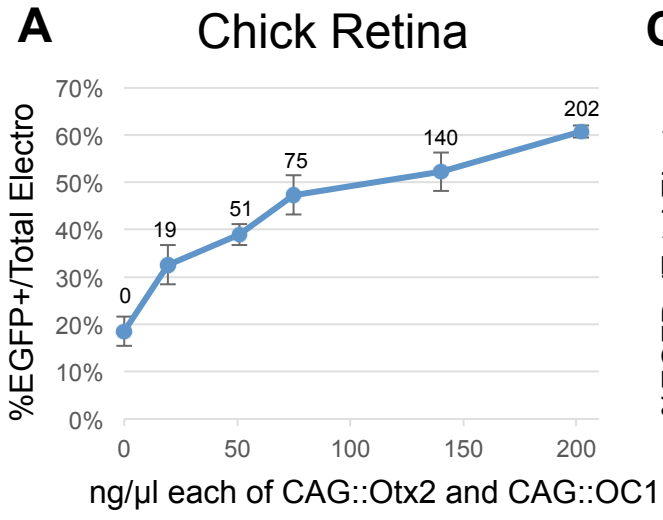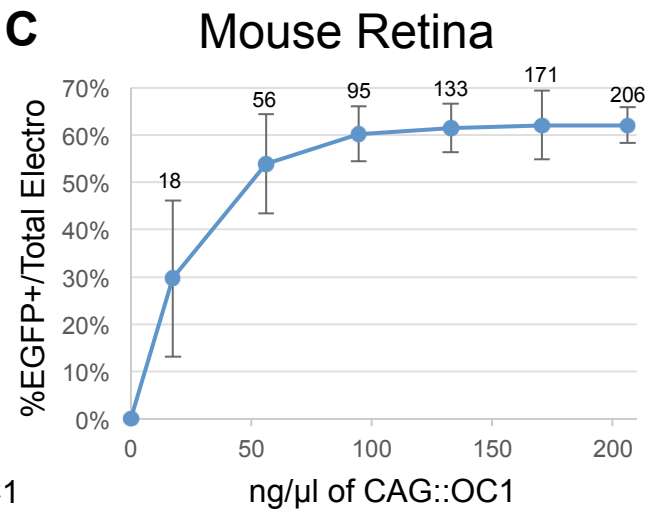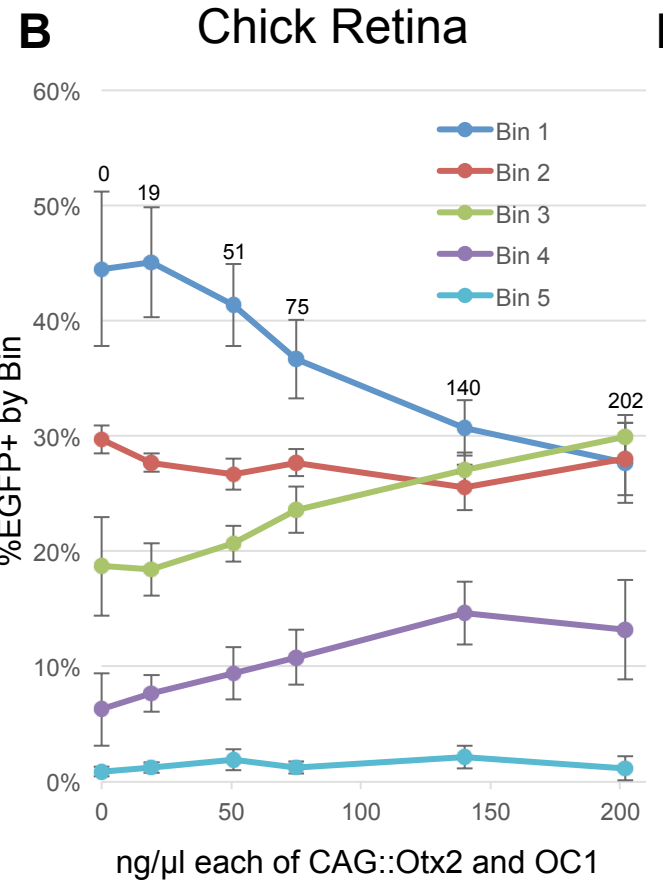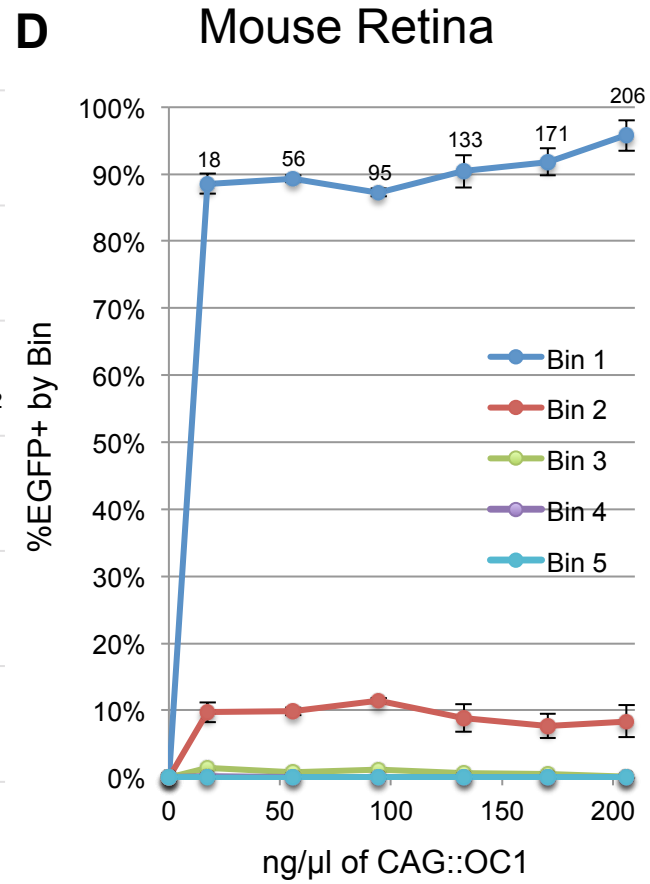

# Figure 5

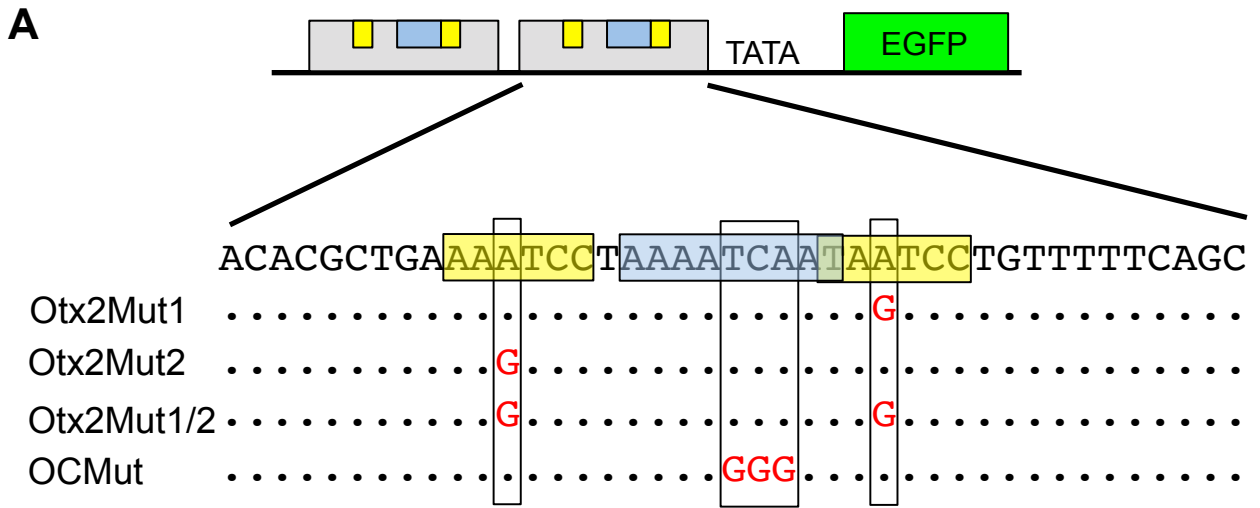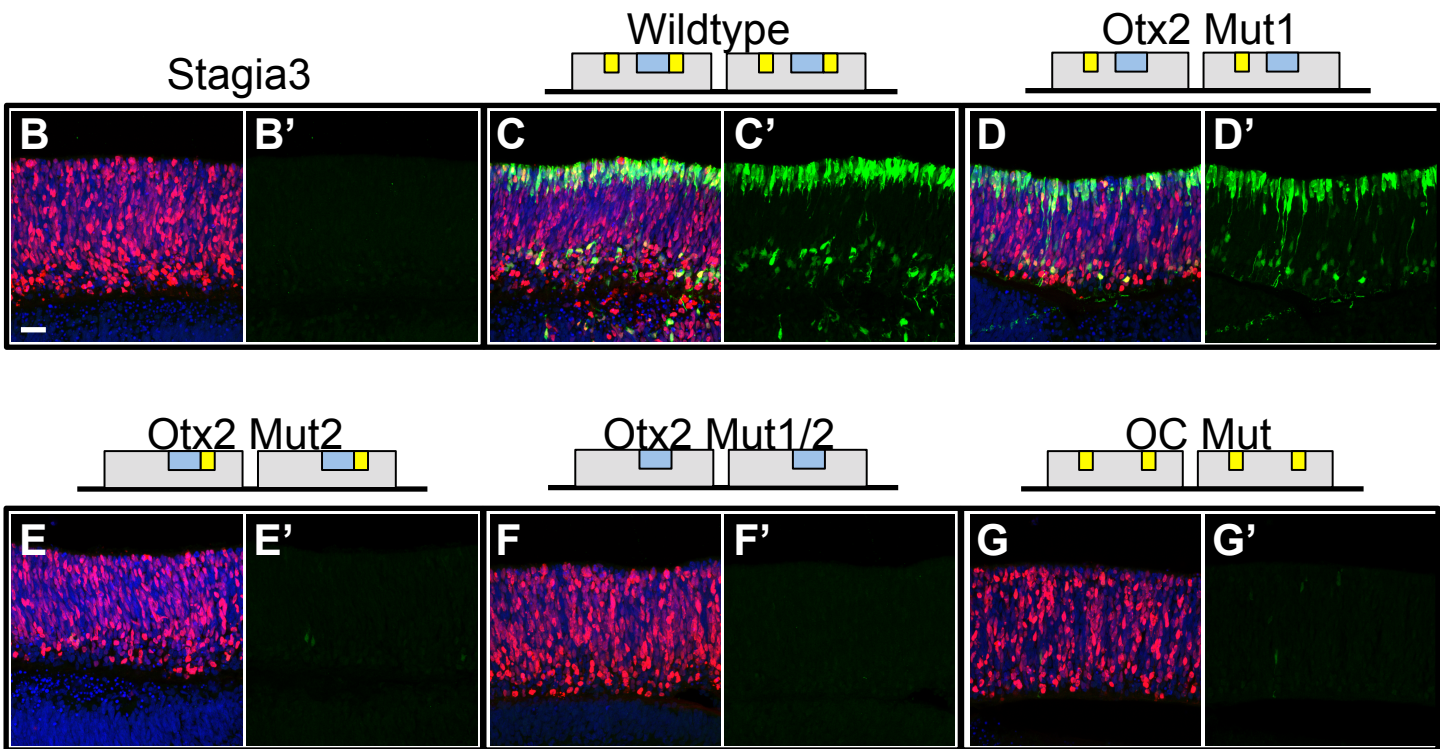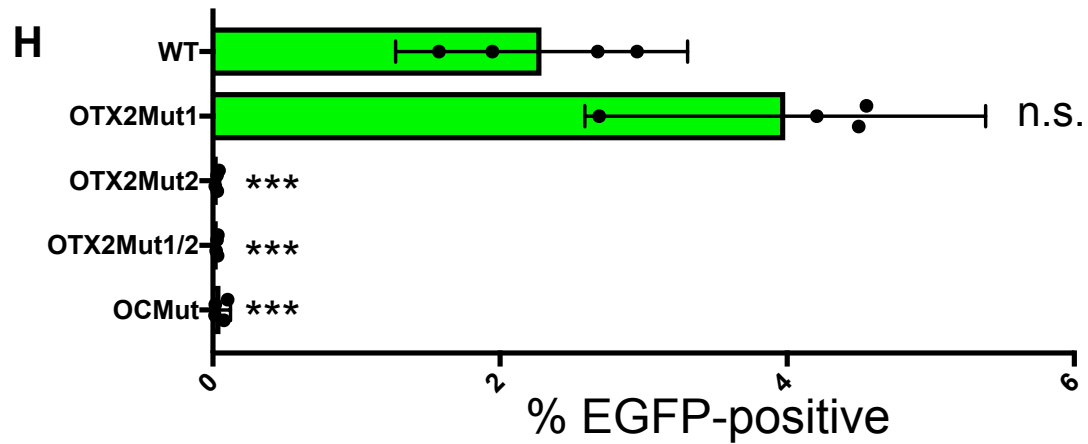

**Figure 6**

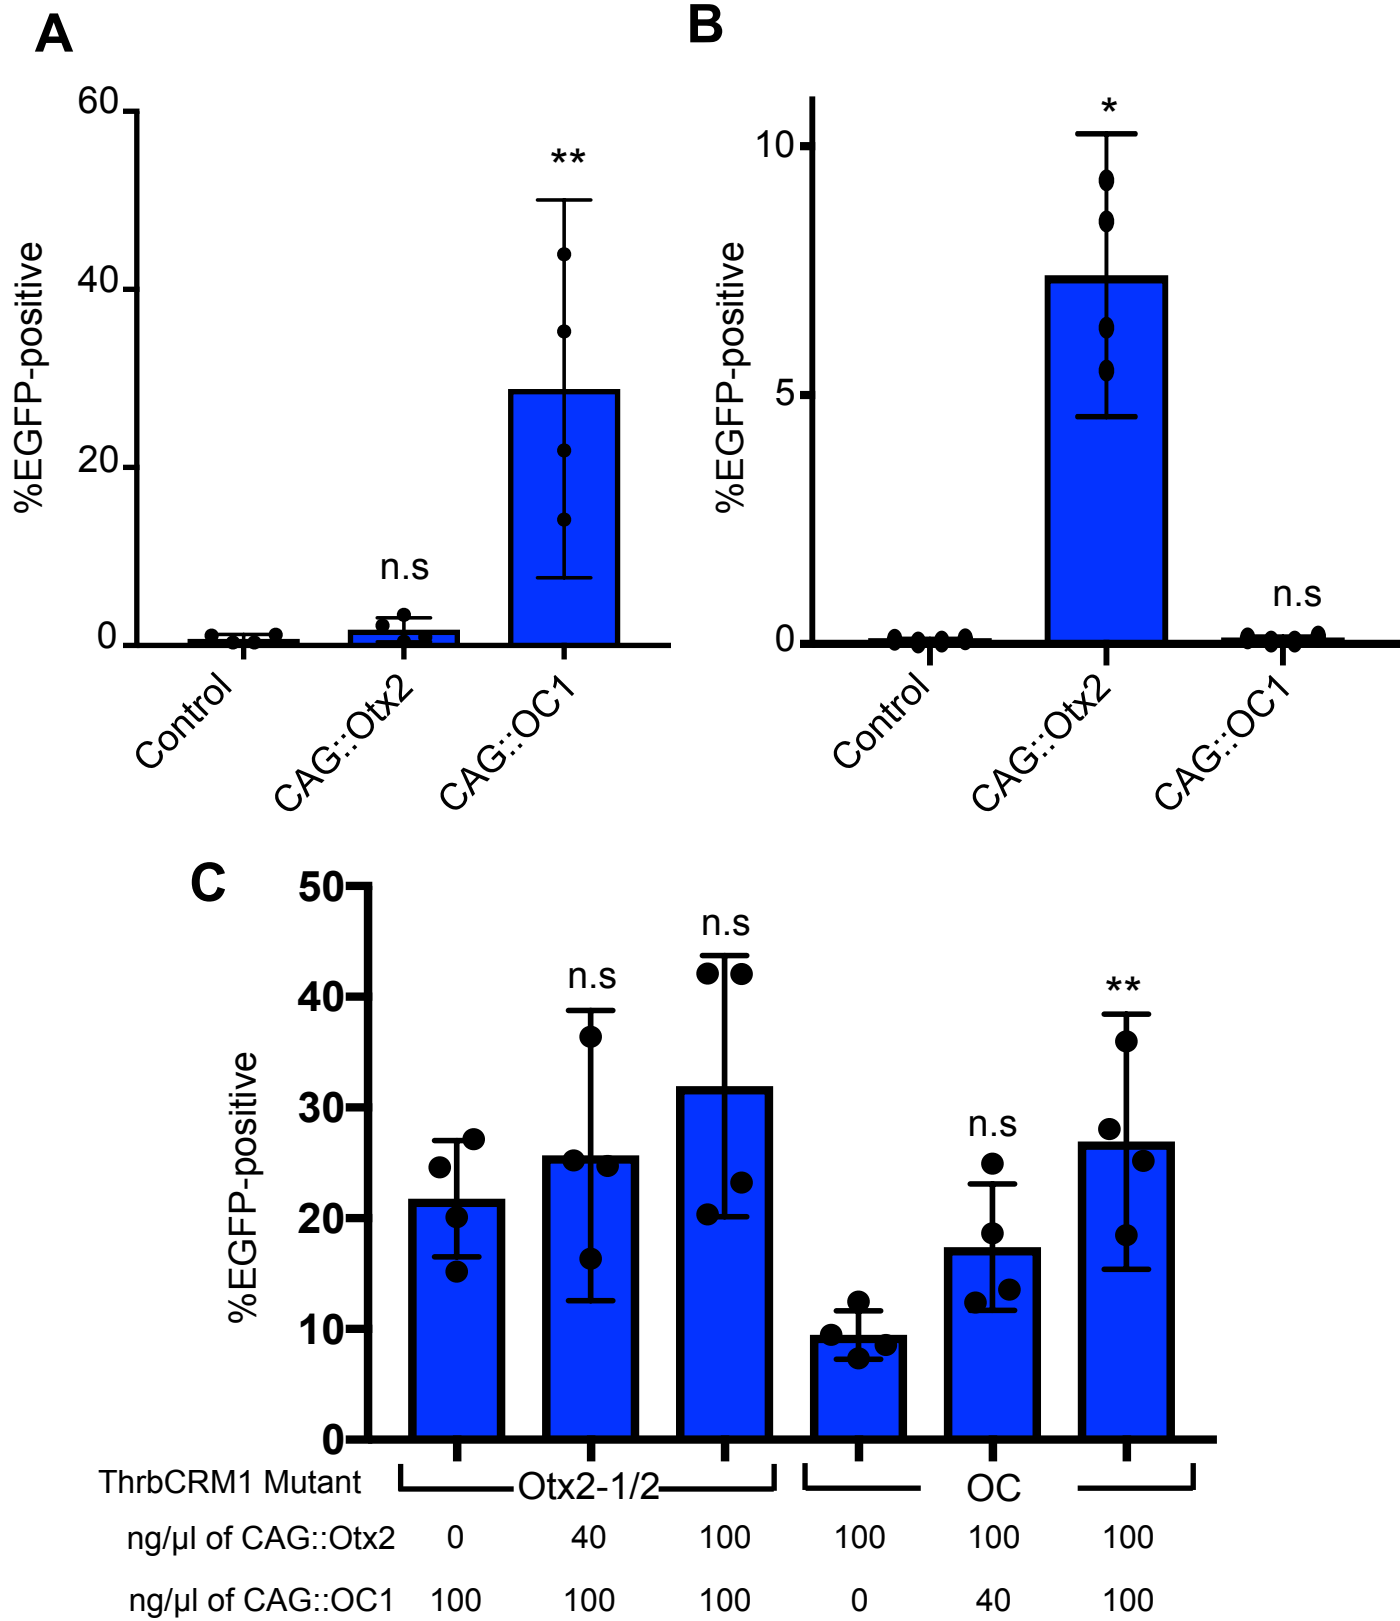

Source: https://www.biorxiv.org/content/10.1101/538751v1.full.pdf
